# Supplementary material for: The Dynamic Accumulation Rules of Chemical Components during the Medicine Formation Period of Angelica sinensis and Chemometric Classifying Analysis for Different Bolting Times Using ATR-FTIR
Source: MDPI journal article supplement (doi:10.3390/molecules28217292), 2023-10-27
Supplement: s1 [file s1]

## Supplementary Materials

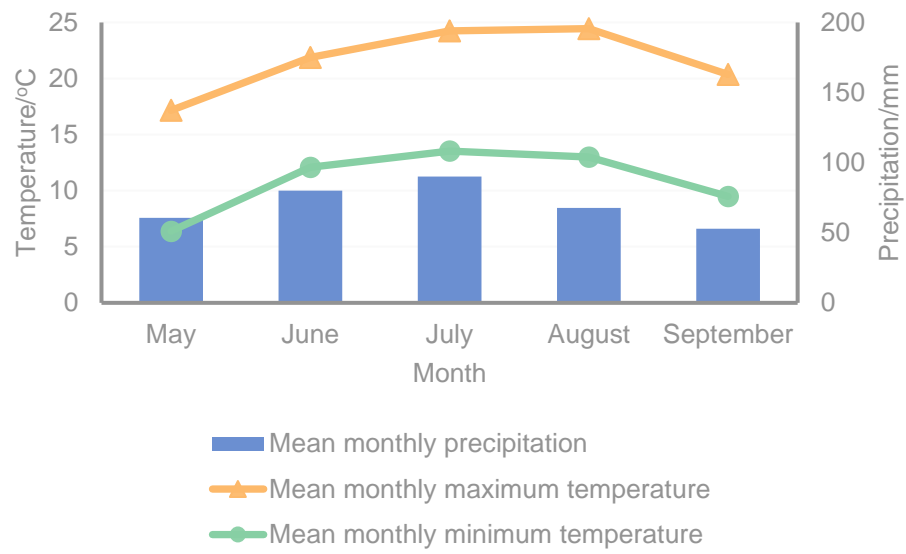

Figure S1. The variation of monthly average temperature and average precipitation in 2019

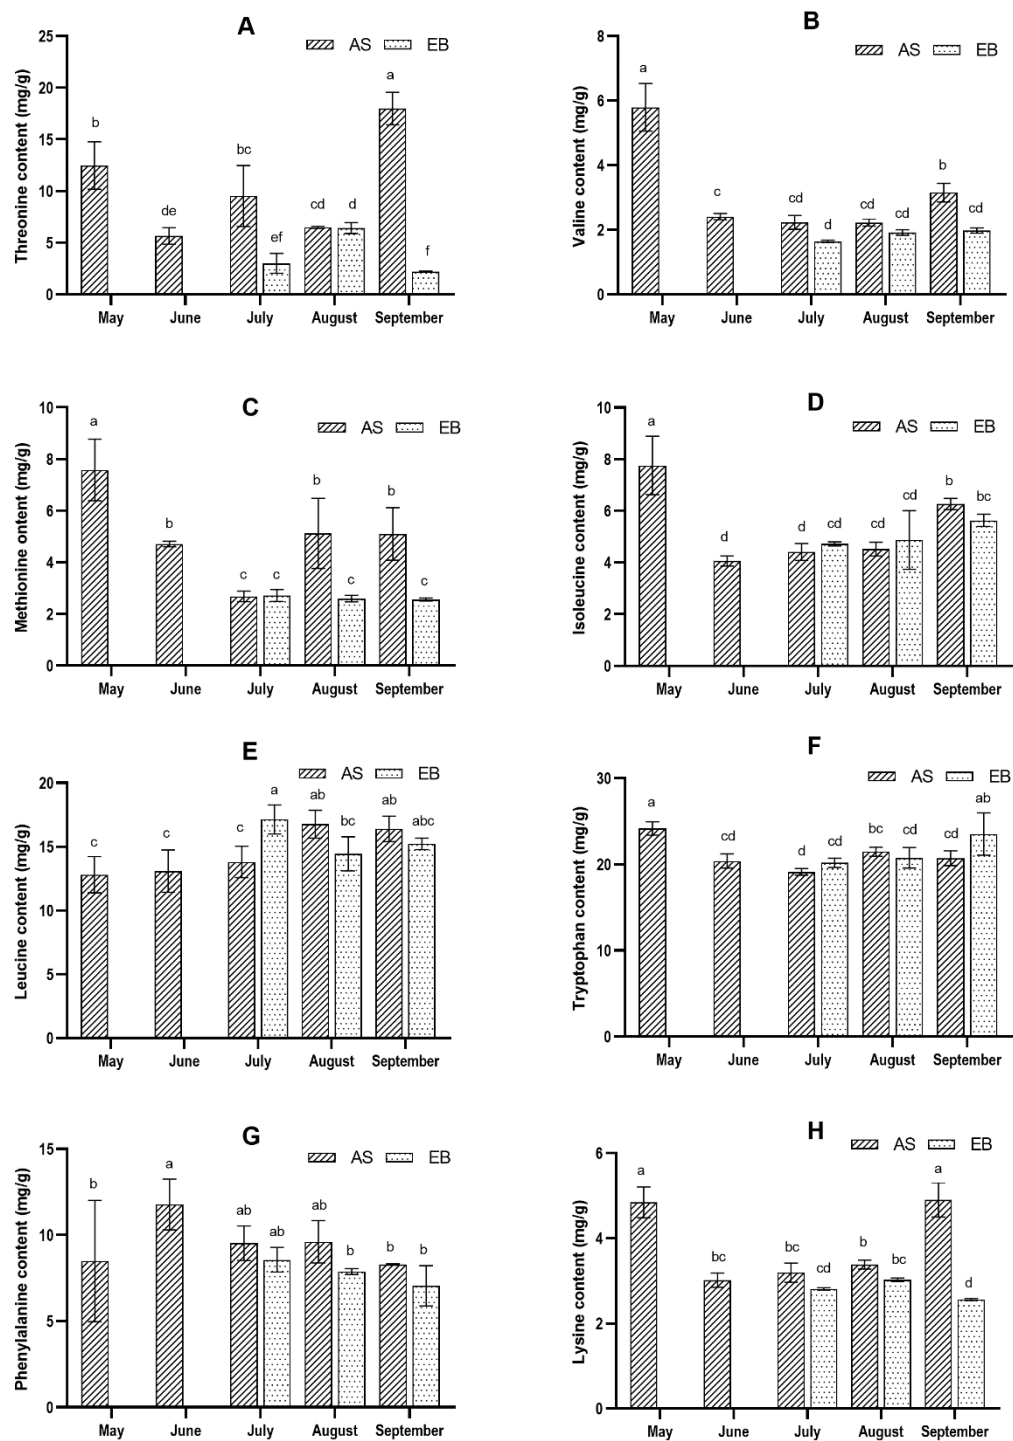

Figure S2. Change in the essential amino acid content of *A. sinensis* in different months: (A) Threonine, (B) Valine, (C) Methionine, (D) Isoleucine, (E) Leucine, (F) Tryptophan, (G) Phenylalanine, (H) Lysine.

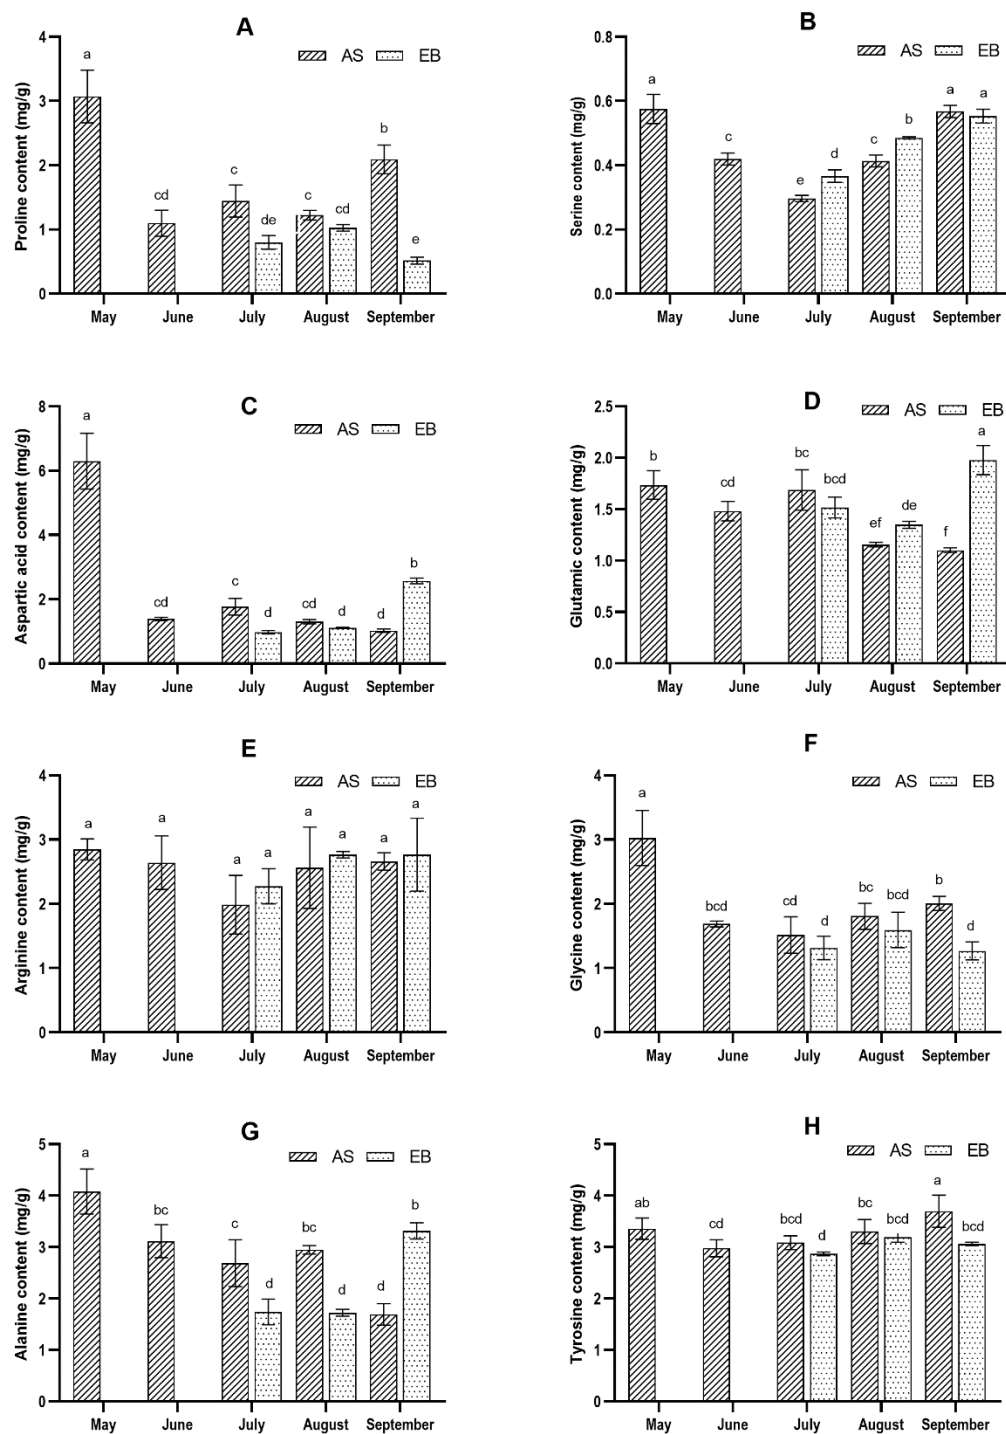

Figure S3. Change in the non-essential amino acid content of *A. sinensis* in different months: (A) Proline, (B) Serine, (C) Aspartic acid, (D) Glutamic, (E) Arginine, (F) Glycine, (G) Alanine, (H) Tyrosine.

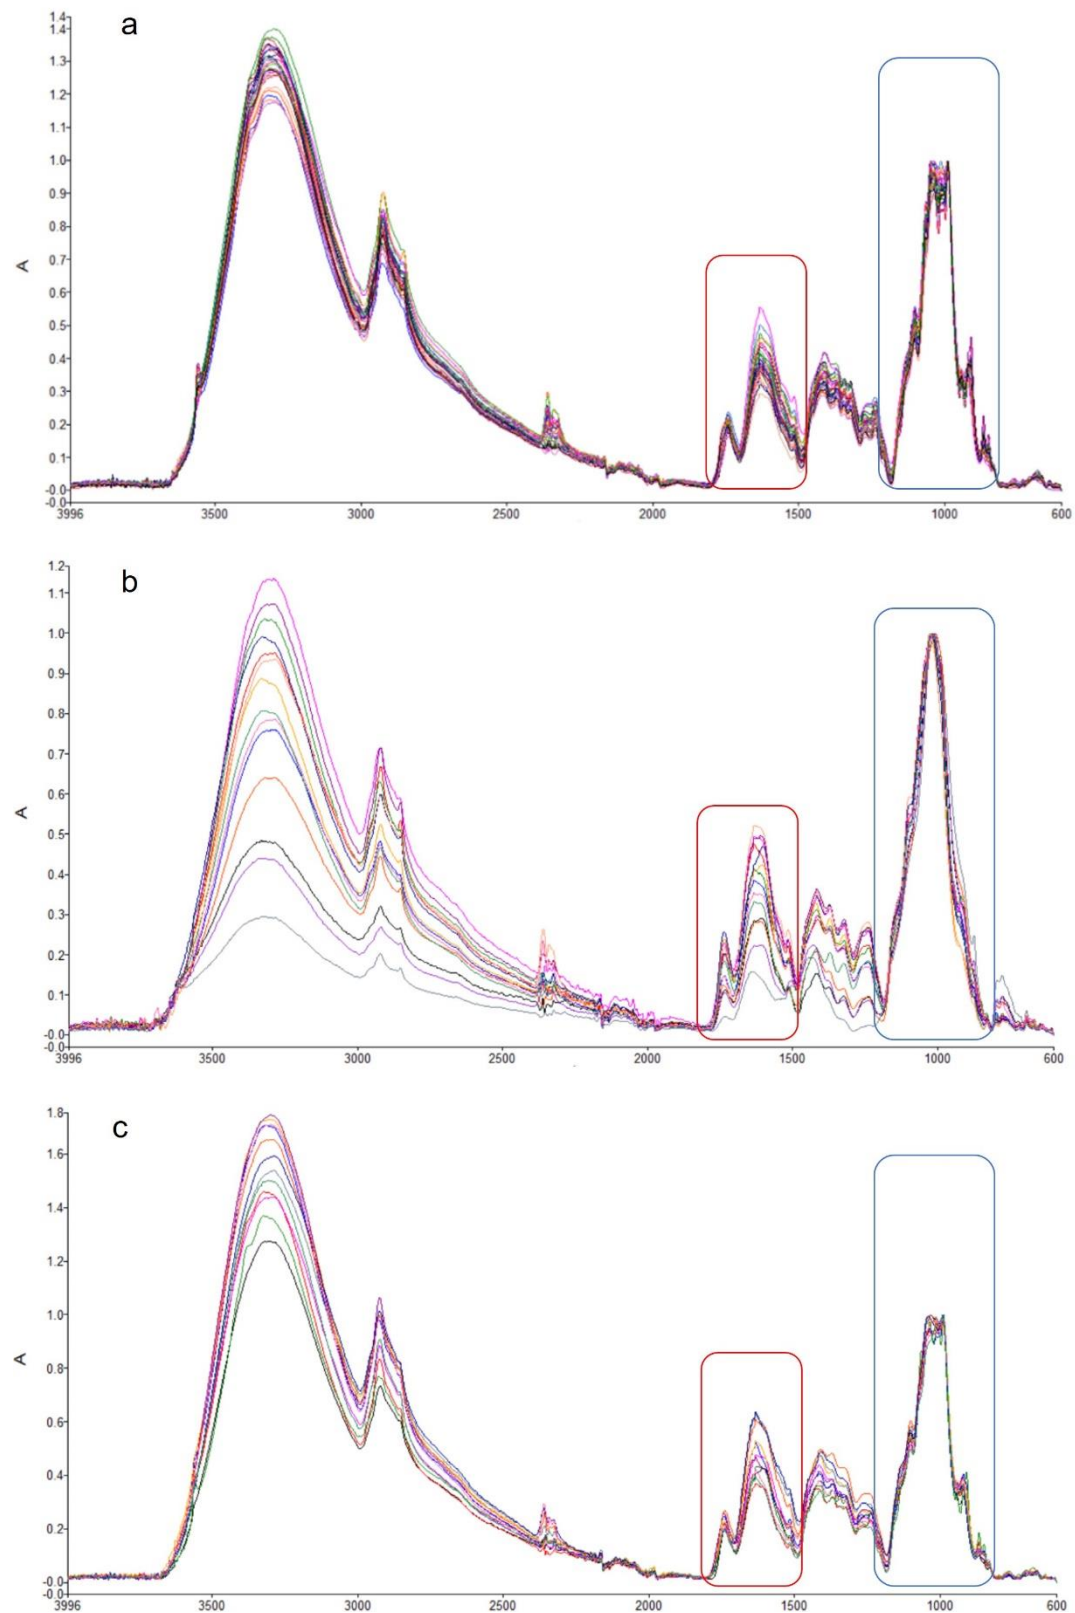

Figure S4. Overall ATR-FTIR spectra of different bolting times in the harvest period: (A) AB root samples, (B) SB root samples and (C) AB root samples

Table S1. Samples information of *A. sinensis* during the root harvest period

| Sample | Producing areas                            | Root length/cm | Root weight/g | Ferulic acid/% | Ligustilide/% | Lignin/% |
|--------|--------------------------------------------|----------------|---------------|----------------|---------------|----------|
| AS-1   | Suigu Village, Min County, Dingxi City     | 22.30          | 115.34        | 0.147          | 2.474         | 24.922   |
|        |                                            | 22.10          | 91.04         |                |               |          |
| AS-2   | Suigu Village, Min County, Dingxi City     | 21.70          | 37.64         | 0.180          | 3.913         | 0.260    |
|        |                                            | 16.70          | 13.67         |                |               |          |
| AS-3   | Mazichuan village, Min County, Dingxi City | 22.10          | 132.03        | 0.153          | 2.947         | 0.264    |
|        |                                            | 18.30          | 101.79        |                |               |          |
|        |                                            | 19.50          | 83.66         |                |               |          |
| AS-4   | Duona Village, Min County, Dingxi City     | 16.80          | 81.72         | 0.137          | 3.182         | 0.269    |
|        |                                            | 16.50          | 111.22        |                |               |          |
| AS-5   | Duona Village, Min County, Dingxi City     | 20.20          | 76.53         | 0.149          | 2.053         | 0.232    |
|        |                                            | 12.00          | 70.21         |                |               |          |
|        |                                            | 8.70           | 18.06         |                |               |          |
| AS-6   | Shuguang Village, Min County, Dingxi City  | 5.70           | 21.05         | 0.137          | 2.974         | 0.245    |
|        |                                            | 15.40          | 41.74         |                |               |          |
|        |                                            | 7.60           | 17.87         |                |               |          |
| AS-7   | Lizhu Village, Min County, Dingxi City     | 12.40          | 141.90        | 0.184          | 2.357         | 0.210    |

|       |                                             |       |        |       |       |       |
|-------|---------------------------------------------|-------|--------|-------|-------|-------|
|       |                                             | 14.60 | 72.50  |       |       |       |
|       |                                             | 15.00 | 25.37  |       |       |       |
| AS-8  | Lizhu Village, Min County, Dingxi City      | 10.60 | 8.98   | 0.138 | 3.082 | 0.260 |
|       |                                             | 13.20 | 20.06  |       |       |       |
| AS-9  | Qiaojiagou Village, Min County, Dingxi City | 13.10 | 78.01  |       |       |       |
|       |                                             | 12.70 | 73.88  | 0.217 | 4.164 | 0.257 |
| AS-10 | Qiaojiagou Village, Min County, Dingxi City | 16.70 | 45.03  |       |       |       |
|       |                                             | 14.10 | 17.09  | 0.173 | 4.663 | 0.255 |
|       |                                             | 16.40 | 85.32  |       |       |       |
| AS-11 | Caotan Village, Min County, Dingxi City     | 16.30 | 69.09  | 0.173 | 3.603 | 0.216 |
|       |                                             | 19.00 | 91.45  |       |       |       |
| AS-12 | Caotan Village, Min County, Dingxi City     | 18.10 | 38.52  |       | 2.156 | 0.239 |
|       |                                             | 16.50 | 41.54  | 0.172 |       |       |
|       |                                             | 19.20 | 41.14  |       |       |       |
| AS-13 | Anjiashan Village, Min County, Dingxi City  | 11.80 | 37.71  | 0.158 | 2.933 | 0.242 |
|       |                                             | 15.70 | 30.55  |       |       |       |
| AS-14 | Linha Village, Min County, Dingxi City      | 20.20 | 135.44 |       |       |       |
|       |                                             | 16.40 | 25.57  | 0.171 | 4.013 | 0.257 |
| AS-15 | Linha Village, Min County, Dingxi City      | 18.20 | 52.63  |       |       |       |
|       |                                             | 14.80 | 5.74   | 0.180 | 3.264 | 0.244 |

|       |                                                   |       |        |       |       |       |
|-------|---------------------------------------------------|-------|--------|-------|-------|-------|
| AS-16 | Wuna Village, Min County, Dingxi City             | 19.20 | 86.13  | 0.154 | 2.211 | 0.230 |
|       |                                                   | 16.40 | 70.08  |       |       |       |
| AS-17 | Dongtan Village, Tianzhu County, Wuwei City       | 19.80 | 56.57  | 0.170 | 2.346 | 0.227 |
|       |                                                   | 21.60 | 36.14  |       |       |       |
| AS-18 | Heigou Village, Tianzhu County, Wuwei City        | 11.20 | 8.06   | 0.144 | 2.049 | 0.238 |
|       |                                                   | 19.40 | 39.91  |       |       |       |
| AS-19 | Heyan Village, Tianzhu County, Wuwei City         | 17.70 | 159.64 | 0.129 | 2.538 | 0.223 |
|       |                                                   | 23.30 | 115.44 |       |       |       |
| AS-20 | Jianshan Village, Tianzhu County, Wuwei City      | 21.80 | 112.96 | 0.217 | 2.721 | 0.233 |
|       |                                                   | 15.40 | 97.02  |       |       |       |
| AS-21 | Shangquantan Village, Tianzhu County, Wuwei City  | 19.30 | 44.95  | 0.178 | 3.738 | 0.252 |
|       |                                                   | 18.70 | 65.20  |       |       |       |
| AS-22 | Huangjiading Village, Linzhao County, Dingxi City | 14.50 | 82.61  | 0.125 | 4.723 | 0.246 |
|       |                                                   | 17.50 | 47.31  |       |       |       |
|       |                                                   | 13.20 | 6.13   |       |       |       |
|       |                                                   | 16.50 | 1.26   |       |       |       |
| AS-23 | Huangjiading Village, Linzhao County, Dingxi City | 12.00 | 2.15   | 0.128 | 3.656 | 0.228 |
|       |                                                   | 13.30 | 0.76   |       |       |       |
|       |                                                   | 12.10 | 10.35  |       |       |       |
| AS-24 | Xialuo Village, Dangchang County, Longnan City    | 18.60 | 92.26  | 0.184 | 2.721 | 0.233 |

|       |                                                |       |        |       |       |       |
|-------|------------------------------------------------|-------|--------|-------|-------|-------|
|       |                                                | 17.20 | 11.92  |       |       |       |
|       |                                                | 16.60 | 22.60  |       |       |       |
|       |                                                | 16.00 | 13.73  |       |       |       |
|       |                                                | 16.90 | 18.61  |       |       |       |
|       |                                                | 20.00 | 113.12 |       |       |       |
|       |                                                | 17.10 | 80.60  |       |       |       |
| AS-25 | Majie Village, Dangchang County, Longnan City  | 16.20 | 87.52  | 0.208 | 2.489 | 0.266 |
|       |                                                | 13.50 | 32.33  |       |       |       |
|       |                                                | 20.90 | 59.23  |       |       |       |
|       |                                                | 17.60 | 53.93  |       |       |       |
| AS-26 | Gufeng Village, Gulang County, Wuwei City      | 12.10 | 73.10  | 0.163 | 1.988 | 0.261 |
|       |                                                | 20.00 | 74.67  |       |       |       |
| AS-27 | Yangjiasi Village, Weiyuan County, Dingxi City | 22.50 | 46.87  | 0.249 | 5.857 | 0.253 |
|       |                                                | 18.50 | 14.25  |       |       |       |
|       |                                                | 17.50 | 37.39  |       |       |       |
| AS-28 | Jianshan Village, Weiyuan County, Dingxi City  | 13.30 | 41.44  | 0.201 | 4.810 | 0.237 |
|       |                                                | 11.10 | 15.42  |       |       |       |
|       |                                                | 10.10 | 13.56  |       |       |       |
| AS-29 | Benmiao Village, Huichuan County, Dingxi City  | 12.60 | 21.74  | 0.165 | 3.015 | 0.229 |
|       |                                                | 8.80  | 4.27   |       |       |       |



|      |                                            |       |       |       |       |       |
|------|--------------------------------------------|-------|-------|-------|-------|-------|
|      |                                            | 14.80 | 5.88  |       |       |       |
|      |                                            | 15.50 | 21.53 |       |       |       |
|      |                                            | 13.40 | 7.07  |       |       |       |
|      |                                            | 11.00 | 19.30 |       |       |       |
|      |                                            | 9.30  | 5.38  |       |       |       |
|      |                                            | 7.40  | 5.72  |       |       |       |
| SB-1 | Mazichuan Village, Min County, Dingxi City | 8.70  | 3.63  | 0.112 | 1.103 | 0.292 |
|      |                                            | 5.90  | 2.68  |       |       |       |
|      |                                            | 7.20  | 2.93  |       |       |       |
|      |                                            | 11.70 | 19.69 |       |       |       |
| SB-2 | Suigu Village, Min County, Dingxi City     | 16.50 | 6.74  | 0.057 | 1.340 | 0.261 |
|      |                                            | 16.50 | 7.06  |       |       |       |
|      |                                            | 16.00 | 9.16  | 0.105 | 1.130 | 0.266 |
| SB-3 | Lizhu Village, Min County, Dingxi City     | 8.70  | 3.57  |       |       |       |
|      |                                            | 13.00 | 20.24 |       |       |       |
| SB-4 | Caotan Village, Min County, Dingxi City    | 16.60 | 13.50 | 0.053 | 0.690 | 0.291 |
|      |                                            | 13.50 | 7.55  |       |       |       |
|      |                                            | 11.10 | 12.48 |       |       |       |
| SB-5 | Heyan Village, Tianzhu County, Wuwei City  | 9.80  | 4.68  | 0.014 | 0.514 | 0.273 |
|      |                                            | 10.00 | 3.52  |       |       |       |

|       |                                                   |       |       |       |       |       |
|-------|---------------------------------------------------|-------|-------|-------|-------|-------|
|       |                                                   | 12.00 | 9.05  |       |       |       |
|       |                                                   | 9.80  | 5.75  |       |       |       |
|       |                                                   | 12.50 | 6.30  |       |       |       |
|       |                                                   | 6.90  | 14.49 |       |       |       |
| SB-6  | Jianshan Village, Tianzhu County, Wuwei City      | 11.60 | 50.81 | 0.071 | 0.967 | 0.239 |
|       |                                                   | 8.90  | 10.40 |       |       |       |
| SB-7  | Shangquantan Village, Tianzhu County, Wuwei City  | 16.90 | 7.28  | 0.069 | 1.033 | 0.308 |
|       |                                                   | 13.50 | 6.58  |       |       |       |
|       |                                                   | 8.50  | 12.27 |       |       |       |
|       |                                                   | 9.00  | 5.56  |       |       |       |
| SB-8  | Huangjiading Village, Linzhao County, Dingxi City | 5.00  | 4.41  | 0.130 | 1.149 | 0.273 |
|       |                                                   | 6.70  | 2.07  |       |       |       |
|       |                                                   | 10.50 | 2.01  |       |       |       |
| SB-9  | Majie Village, Dangchang County, Longnan City     | 9.10  | 9.66  | 0.080 | 0.877 | 0.298 |
|       |                                                   | 9.00  | 6.59  |       |       |       |
| SB-10 | Xialuo Village, Dangchang County, Longnan City    | 6.30  | 12.52 | 0.076 | 0.721 | 0.272 |
|       |                                                   | 9.50  | 14.70 |       |       |       |
| SB-11 | Gufeng Village, Gulang County, Wuwei City         | 10.4  | 6.02  | 0.045 | 0.670 | 0.285 |
|       |                                                   | 8.40  | 23.38 |       |       |       |
| SB-12 | Jianshan Village, Tianzhu County, Wuwei City      | 9.40  | 9.77  | 0.097 | 1.154 | 0.218 |

|       |                                                |       |        |       |       |       |
|-------|------------------------------------------------|-------|--------|-------|-------|-------|
|       |                                                | 11.60 | 43.10  |       |       |       |
| SB-13 | Yangjiasi Village, Weiyuan County, Dingxi City | 8.70  | 3.55   | 0.090 | 0.981 | 0.350 |
|       |                                                | 6.10  | 4.25   |       |       |       |
| SB-14 | Benmiao Village, Huichuan County, Dingxi City  | 4.40  | 12.86  | 0.014 | 0.551 | 0.233 |
|       |                                                | 5.40  | 6.50   |       |       |       |
| AB-1  | Mazichuan Village, Min County, Dingxi City     | 13.60 | 123.40 | 0.168 | 1.934 | 0.266 |
|       |                                                | 15.80 | 87.74  |       |       |       |
|       |                                                | 17.60 | 78.14  |       |       |       |
| AB-2  | Duona Village, Min County, Dingxi City         | 18.70 | 78.39  | 0.179 | 1.540 | 0.249 |
|       |                                                | 15.80 | 45.07  |       |       |       |
|       |                                                | 18.40 | 98.40  |       |       |       |
|       |                                                | 15.70 | 29.66  |       |       |       |
| AB-3  | Wuna Village, Min County, Dingxi City          | 18.30 | 22.52  | 0.143 | 1.380 | 0.253 |
|       |                                                | 19.30 | 30.29  |       |       |       |
|       |                                                | 18.70 | 81.60  |       |       |       |
|       |                                                | 14.00 | 97.73  |       |       |       |
| AB-4  | Liha Village, Min County, Dingxi City          | 9.80  | 45.70  | 0.092 | 1.804 | 0.238 |
|       |                                                | 6.90  | 26.74  |       |       |       |
| AB-5  | Heigou Village, Tianzhu County, Wuwei City     | 13.00 | 20.69  | 0.130 | 0.876 | 0.242 |
|       |                                                | 12.30 | 8.40   |       |       |       |

|       |                                                   |       |        |       |       |       |
|-------|---------------------------------------------------|-------|--------|-------|-------|-------|
| AB-6  | Dongtan Village, Tianzhu County, Wuwei City       | 10.00 | 17.81  | 0.116 | 1.226 | 0.250 |
|       |                                                   | 24.10 | 19.53  |       |       |       |
| AB-7  | Huangjiading Village, Linzhao County, Dingxi City | 13.50 | 72.84  | 0.239 | 2.537 | 0.262 |
|       |                                                   | 11.50 | 50.10  |       |       |       |
| AB-8  | Majie Village, Dangchang County, Longnan City     | 12.40 | 47.81  | 0.209 | 1.741 | 0.245 |
|       |                                                   | 13.30 | 34.38  |       |       |       |
| AB-9  | Xialuo Village, Dangchang County, Longnan City    | 11.70 | 16.99  | 0.185 | 3.241 | 0.253 |
|       |                                                   | 18.60 | 105.52 |       |       |       |
| AB-10 | Gufeng Village, Gulang County, Wuwei City         | 10.40 | 63.39  | 0.107 | 1.251 | 0.267 |
|       |                                                   | 19.10 | 53.29  |       |       |       |
| AB-11 | Yangjiasi Village, Weiyuan County, Dingxi City    | 23.10 | 62.73  | 0.108 | 1.324 | 0.241 |
|       |                                                   | 14.70 | 38.33  |       |       |       |
| AB-12 | Benmiao Village, Huichuan County, Dingxi City     | 13.50 | 14.60  | 0.231 | 2.586 | 0.292 |
|       |                                                   | 5.50  | 14.11  |       |       |       |
|       |                                                   | 11.50 | 45.32  |       |       |       |
|       |                                                   | 9.50  | 30.64  |       |       |       |

Table S2. The calibration curve of target ingredients

| Ingredients          | Calibration curves                  | Related coefficient ( $R^2$ ) |
|----------------------|-------------------------------------|-------------------------------|
| Glucose              | $y = 8.3224x + 0.0238$              | 0.9957                        |
| Bovine serum albumin | $y = 1.0328x - 0.0113$              | 0.9978                        |
| Aspartic acid        | $y = 794771695.1x - 5154.18264$     | 0.9999                        |
| Glutamic             | $y = 689728928.5x - 4925.76946$     | 0.9999                        |
| Serine               | $y = 11031886054.0x - 225339.42860$ | 0.9949                        |
| Arginine             | $y = 948120475.5x - 1577.70817$     | 0.9925                        |
| Glycine              | $y = 799568974.6x - 5546.63174$     | 0.9998                        |
| Threonine            | $y = 620208409.3x + 8122.52994$     | 0.9988                        |
| Proline              | $y = 122714429.8x - 2866.33533$     | 0.9955                        |
| Alanine              | $y = 1793349036.0x - 19172.81437$   | 0.9998                        |
| Valine               | $y = 595828728.9x - 5823.73653$     | 0.9989                        |
| Methionine           | $y = 662691616.8x - 4509.14970$     | 0.9991                        |
| Isoleucine           | $y = 299348470.1x - 8414.06226$     | 0.9965                        |
| Leucine              | $y = 912231372.5x - 546.07843$      | 0.9984                        |
| Tryptophan           | $y = 1021649334.0x - 43539.47605$   | 0.9981                        |
| Phenylalanine        | $y = 445585846.3x + 2892.64981$     | 0.9932                        |
| Lysin                | $y = 979015908.2x - 22262.83234$    | 0.9999                        |
| Tyrosine             | $y = 588521850.2x - 15652.05988$    | 0.9997                        |
| Ferulic acid         | $y = 5032691.1010x - 297.1657$      | 0.9999                        |
| Ligustilide          | $y = 516197.0035x$                  | 0.9999                        |
| Lignin               | $y = 28.707x + 0.1724$              | 0.9921                        |
| Total C element      | $y = 8923.00529x - 316.3809x^2$     | 0.9999                        |
| Total N element      | $y = 3231.03527x$                   | 0.9998                        |
